# Supplementary material for: Unraveling Microbial Volatile Elicitors Using a Transparent Methodology for Induction of Systemic Resistance and Regulation of Antioxidant Genes at Expression Levels in Chili against Bacterial Wilt Disease
Source: MDPI journal article supplement (doi:10.3390/antiox11020404), 2022-02-16
Supplement: s1 [file s1]

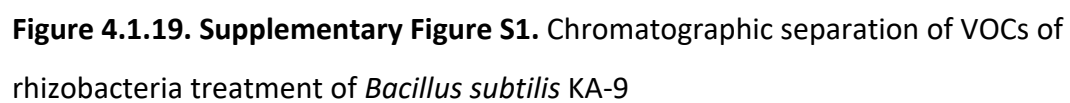

**Figure 4.1.19. Supplementary Figure S1.** Chromatographic separation of VOCs of rhizobacteria treatment of *Bacillus subtilis* KA-9
