# Supplementary material for: Unraveling Microbial Volatile Elicitors Using a Transparent Methodology for Induction of Systemic Resistance and Regulation of Antioxidant Genes at Expression Levels in Chili against Bacterial Wilt Disease
Source: MDPI journal article supplement (doi:10.3390/antiox11020404), 2022-02-16
Supplement: s1 [file s1]

**Table S12.** Population of *R. solanacearum* in the rhizosphere soil of chilli plant under different treatment

| Treatments/hours | Population of <i>R. solanacearum</i> (log CFU/g root) |                         |                          |                          |                          |
|------------------|-------------------------------------------------------|-------------------------|--------------------------|--------------------------|--------------------------|
|                  | 0hapi                                                 | 24hapi                  | 48hapi                   | 72hapi                   | 96hapi                   |
| Control          | 0 <sup>d</sup>                                        | 0 <sup>e</sup>          | 0 <sup>e</sup>           | 0 <sup>e</sup>           | 0 <sup>e</sup>           |
| KA9+RS           | 2 ± 0.04 <sup>c</sup>                                 | 2.5 ± 0.06 <sup>c</sup> | 1.75 ± 0.02 <sup>c</sup> | 1.59 ± 0.01 <sup>b</sup> | 1.52 ± 0.02 <sup>c</sup> |
| PSD1+RS          | 2.5 ± 0.06 <sup>a</sup>                               | 2.9 ± 0.13 <sup>b</sup> | 2.2 ± 0.04 <sup>b</sup>  | 1.9 ± 0.03 <sup>c</sup>  | 1.9 ± 0.01 <sup>b</sup>  |
| RS + KA9+PDS1    | 2.2 ± 0.03 <sup>b</sup>                               | 2 ± 0.06 <sup>d</sup>   | 1.2 ± 0.09 <sup>d</sup>  | 1.2 ± 0.08 <sup>d</sup>  | 1 ± 0.06 <sup>d</sup>    |
| RS               | 2 ± 0.29 <sup>c</sup>                                 | 3.1 ± 0.09 <sup>a</sup> | 5.9 ± 0.06 <sup>a</sup>  | 5.4 ± 0.05 <sup>a</sup>  | 4 ± 0.16 <sup>a</sup>    |

Means followed by the same letter within a column are not significantly different as determined by LSD test ( $\alpha = 0.05$ ). Data present means of the experiment within three replications each.
