# Supplementary material for: Unraveling Microbial Volatile Elicitors Using a Transparent Methodology for Induction of Systemic Resistance and Regulation of Antioxidant Genes at Expression Levels in Chili against Bacterial Wilt Disease
Source: MDPI journal article supplement (doi:10.3390/antiox11020404), 2022-02-16
Supplement: s1 [file s1]

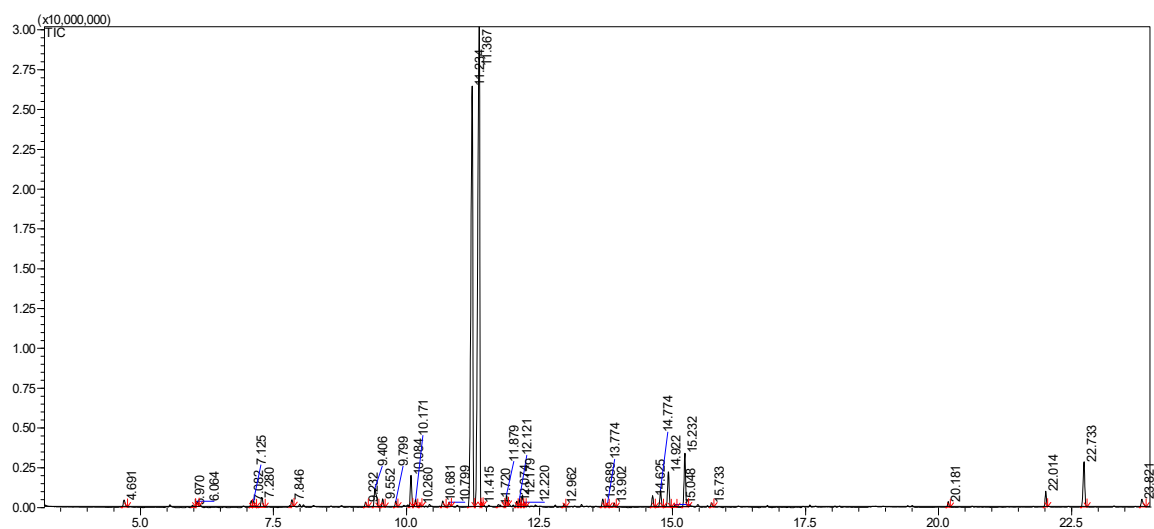

Supplementary Figure S3.(a) Chromatographic separation of VOCs of rhizobacteria treatment T2 (*B. subtilis* KA9).

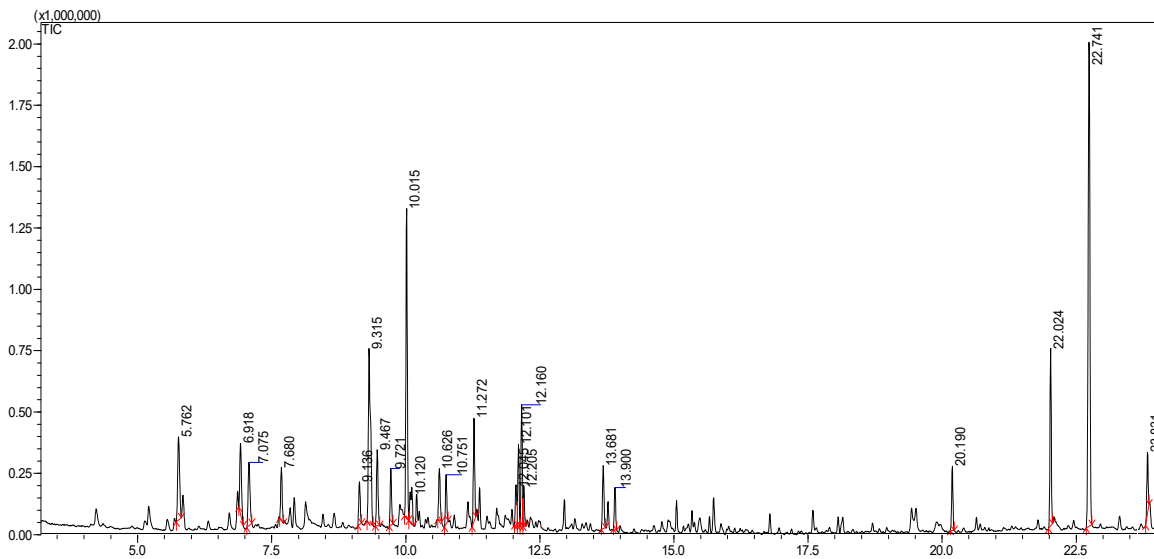

Supplementary Figure S3 (b). Chromatographic separation of VOCs of rhizobacteria treatment T5 (*P. fluorescens* + *R. solanacearum*).

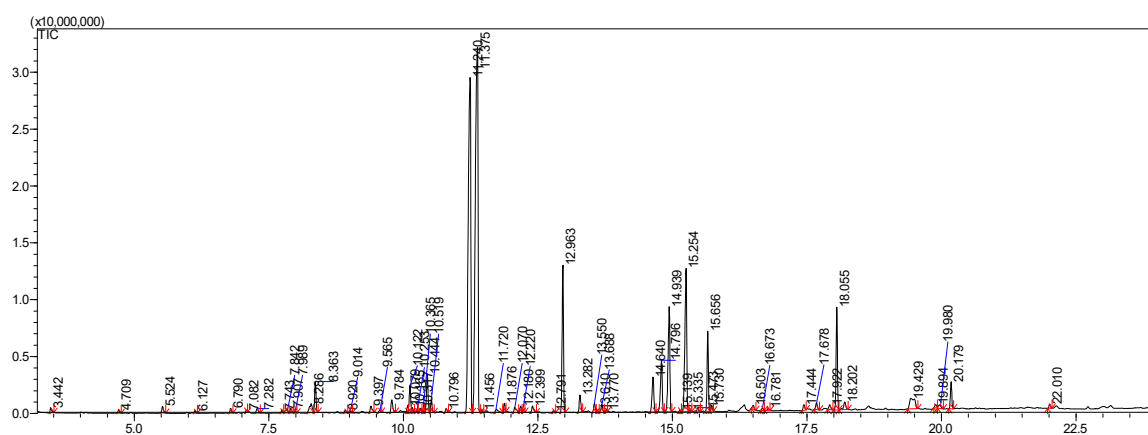

Supplementary Figure S3 (c). Chromatographic separation of VOCs of rhizobacteria treatment T7 (*Ralstonia solanacearum*).

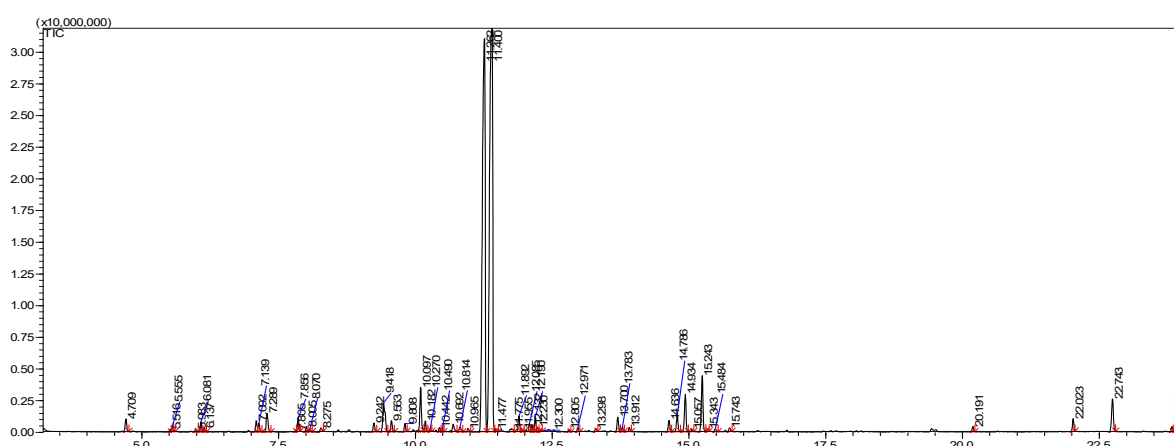

Supplementary Figure S3 (d). Chromatographic separation of VOCs of rhizobacteria treatment T3 (*P. fluorescens PDS1*).

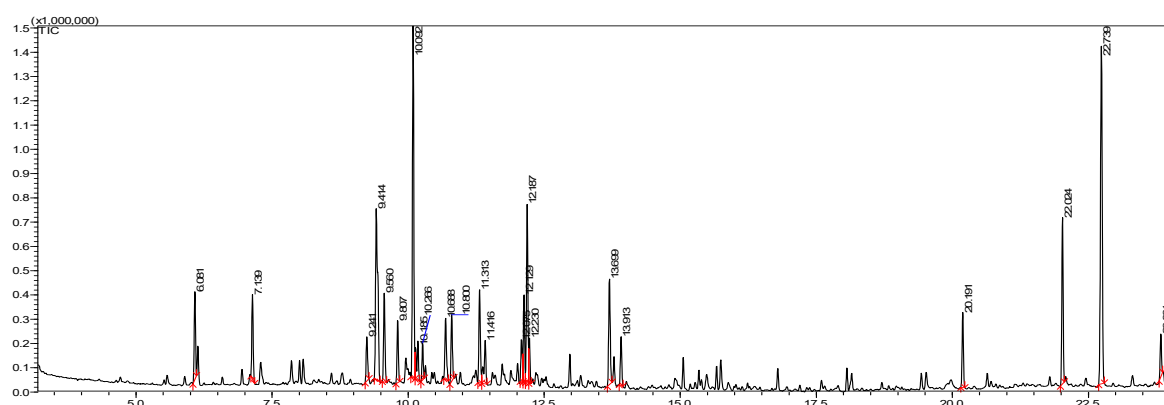

Supplementary Figure S3 (e). Chromatographic separation of VOCs of rhizobacteria treatment T4 (*B. subtilis KA9+ R. solanacearum*).
