# Supplementary material for: Unraveling Microbial Volatile Elicitors Using a Transparent Methodology for Induction of Systemic Resistance and Regulation of Antioxidant Genes at Expression Levels in Chili against Bacterial Wilt Disease
Source: MDPI journal article supplement (doi:10.3390/antiox11020404), 2022-02-16
Supplement: s1 [file s1]

**Table 4.2.9. Supplementary Table S1** Effect of volatile compound produce by biocontrol agents on induction of Peroxidase activities in chilli leaves against *R. solanacearum* in glasshouse conditions.

| Treatments                        | Peroxidase activity ( $\Delta$ OD/min/mg protein) |                                       |                         |                         |                         |            |
|-----------------------------------|---------------------------------------------------|---------------------------------------|-------------------------|-------------------------|-------------------------|------------|
|                                   | 0hapi                                             | 24hapi                                | 48hapi                  | 72hapi                  | 96hapi                  | Mean value |
| T1 (Control)                      | 0.012 $\pm$ 0.001<br>bc                           | 0.017 $\pm$ 0.00<br><sup>d</sup><br>2 | 0.021 $\pm$ 0.001<br>f  | 0.019 $\pm$ 0.002<br>d  | 0.017 $\pm$ 0.002<br>d  | 0.017      |
| T2 ( <i>B. subtilis</i> KA9)      | 0.012 $\pm$ 0.001<br>bc                           | 0.029 $\pm$ 0.00<br><sup>c</sup><br>2 | 0.052 $\pm$ 0.002<br>e  | 0.048 $\pm$ 0.002<br>c  | 0.038 $\pm$ 0.003<br>c  | 0.035      |
| T3 ( <i>P. fluorescens</i> PDS1)  | 0.015 $\pm$ 0.001<br>a                            | 0.027 $\pm$ 0.00<br><sup>c</sup><br>3 | 0.064 $\pm$ 0.003<br>cd | 0.061 $\pm$ 0.002<br>ab | 0.042 $\pm$ 0.002<br>bc | 0.041      |
| T4 ( <i>B. subtilis</i> KA9 + RS) | 0.014 $\pm$ 0.001<br>ab                           | 0.046 $\pm$ 0.00<br><sup>b</sup><br>3 | 0.069 $\pm$ 0.003<br>c  | 0.056 $\pm$ 0.002<br>b  | 0.051 $\pm$ 0.002<br>a  | 0.047      |
| T5 ( <i>P. fluorescens</i> + RS)  | 0.013 $\pm$ 0.001<br>ab                           | 0.049 $\pm$ 0.00<br><sup>b</sup><br>2 | 0.080 $\pm$ 0.002<br>b  | 0.058 $\pm$ 0.002<br>ab | 0.048 $\pm$ 0.002<br>ab | 0.049      |
| T6(RS+ KA9+ PDS1)                 | 0.014 $\pm$ 0.001<br>ab                           | 0.056 $\pm$ 0.00<br><sup>a</sup><br>3 | 0.090 $\pm$ 0.002<br>a  | 0.064 $\pm$ 0.002<br>a  | 0.051 $\pm$ 0.002<br>a  | 0.055      |
| T7 (RS)                           | 0.013 $\pm$ 0.001<br>ab                           | 0.029 $\pm$ 0.00<br><sup>c</sup><br>2 | 0.059 $\pm$ 0.002<br>d  | 0.043 $\pm$ 0.002<br>c  | 0.045 $\pm$ 0.002<br>b  | 0.037      |
| Mean value                        | 0.013                                             | 0.036                                 | 0.062                   | 0.049                   | 0.041                   | -          |
| C.D.                              | 0.002                                             | 0.007                                 | 0.007                   | 0.006                   | 0.006                   | -          |
| SE(m)                             | 0.001                                             | 0.002                                 | 0.002                   | 0.002                   | 0.002                   | -          |
| SE(d)                             | 0.001                                             | 0.003                                 | 0.003                   | 0.003                   | 0.003                   | -          |
| C.V.                              | 9.627                                             | 14.266                                | 8.371                   | 8.929                   | 11.189                  | -          |
