# Supplementary material for: Unraveling Microbial Volatile Elicitors Using a Transparent Methodology for Induction of Systemic Resistance and Regulation of Antioxidant Genes at Expression Levels in Chili against Bacterial Wilt Disease
Source: MDPI journal article supplement (doi:10.3390/antiox11020404), 2022-02-16
Supplement: s1 [file s1]

**Supplementary Table S2** Effect of volatile compound produce by biocontrol agents on induction of peroxidase (PO) activities in chilli Roots against *R. solanacearum* in glasshouse condition

| Treatments                        | Peroxidase activity ( $\Delta$ OD/min/mg protein) |                     |                     |                     |                     |            |
|-----------------------------------|---------------------------------------------------|---------------------|---------------------|---------------------|---------------------|------------|
|                                   | 0 hapi                                            | 24hapi              | 48hapi              | 72hapi              | 96hapi              | Mean value |
| T1 (Control)                      | 0.0019 $\pm$ 0.030d                               | 0.0031 $\pm$ 0.029f | 0.0028 $\pm$ 0.021f | 0.0027 $\pm$ 0.021d | 0.0028 $\pm$ 0.020c | 0.026      |
| T2 ( <i>B. subtilis</i> KA9)      | 0.0022 $\pm$ 0.024c                               | 0.0045 $\pm$ 0.032e | 0.0051 $\pm$ 0.014e | 0.0042 $\pm$ 0.027b | 0.0028 $\pm$ 0.026c | 0.037      |
| T3 ( <i>P. fluorescens</i> PDS1)  | 0.0028 $\pm$ 0.027b                               | 0.0050 $\pm$ 0.022d | 0.0060 $\pm$ 0.014d | 0.0050 $\pm$ 0.031a | 0.0038 $\pm$ 0.019a | 0.045      |
| T4 ( <i>B. subtilis</i> KA9 + RS) | 0.0034 $\pm$ 0.023a                               | 0.0060 $\pm$ 0.027b | 0.0074 $\pm$ 0.022c | 0.0043 $\pm$ 0.039b | 0.0033 $\pm$ 0.024b | 0.048      |
| T5 ( <i>P. fluorescens</i> + RS)  | 0.0031 $\pm$ 0.024a                               | 0.0058 $\pm$ 0.021c | 0.0082 $\pm$ 0.020b | 0.0033 $\pm$ 0.02c  | 0.0028 $\pm$ 0.022c | 0.046      |
| T6(RS+KA9+PDS1)                   | 0.0034 $\pm$ 0.025a                               | 0.0073 $\pm$ 0.021a | 0.0092 $\pm$ 0.02a  | 0.0033 $\pm$ 0.024c | 0.0025 $\pm$ 0.022d | 0.051      |
| T7 (RS)                           | 0.0024 $\pm$ 0.008c                               | 0.0052 $\pm$ 0.027d | 0.0077 $\pm$ 0.020c | 0.0036 $\pm$ 0.021c | 0.0028 $\pm$ 0.030c | 0.043      |
| Mean vlue                         | 0.027                                             | 0.052               | 0.066               | 0.037               | 0.029               | -          |
