# Supplementary material for: Unraveling Microbial Volatile Elicitors Using a Transparent Methodology for Induction of Systemic Resistance and Regulation of Antioxidant Genes at Expression Levels in Chili against Bacterial Wilt Disease
Source: MDPI journal article supplement (doi:10.3390/antiox11020404), 2022-02-16
Supplement: s1 [file s1]

**Table S11.** Gas chromatography-mass spectrometry (GC-MS) profile of volatile organic compounds (VOCs) produced by rhizobacteria against *R. solanacearum* under *in vitro* conditions.

| Compounds                                            | Retention Time | Peak Area (%)                |                                     |
|------------------------------------------------------|----------------|------------------------------|-------------------------------------|
|                                                      |                | <i>Bacillus subtilis</i> KA9 | <i>Pseudomonas fluorescens</i> PDS1 |
| 2-ethyl 3, 6-dimethyl pyrazine                       | 13.44          | 22.59 ±0.04                  | 28.07±0.33                          |
| 3-hydroxy-2-butanone (acetoin)                       | 10.045         | 13.68±0.33                   | 10.02±0.94                          |
| Benzaldehyde                                         | 18             | 0.32±0.44                    | 0.43±0.04                           |
| Cycloheptasiloxane                                   | 17.605         | 0.73±0.05                    | -                                   |
| 2-methyl pyrazine                                    | 22.975         | 15.95±0.55                   | 24.40±0.22                          |
| 1-Undecene                                           | 11.165         | -                            | 7.10±0.88                           |
| Diethylphthalate                                     | 6.095          | 7.75±0.33                    | 7.10±0.04                           |
| Cyclohexanone                                        | 12.722         | 0.22±0.02                    | 0.20±0.33                           |
| (1,2, $\alpha$ ) pyrazine-1,4-dione                  | 21.052         | 3.96±0.22                    | -                                   |
| 4-Hydroxy-5-methyl-2-hexanone                        | 07.966         | 0.43±0.38                    | 0.87±0.07                           |
| 2,4-di-tert-Butylphenol                              | 10.709         | 0.47±0.44                    | 0.46±0.44                           |
| Hexadecane                                           | 4.675          | 0.98±0.05                    | 0.23±0.02                           |
| Hexahydropyrrolo (1,2, $\alpha$ ) pyrazine-1,4-dione | 18.025         | 4.78±0.54                    | 3.23±0.02                           |
| Isoamyl alcohol                                      | 2.084          | 10.07±0.04                   | 20.09±0.02                          |
| Disulphide, dimethyl                                 | 7.0123         | 2.87±0.08                    | 6.34±0.14                           |

The compounds possibly generated by rhizobacteria treatments were identified by comparing their mass spectra to those in the NIST Mass Spectral Library (probability-based match >85%). Values are expressed as means of the relative content of each compound (n = 3). The peak area of each compound was calculated in percentage relative to the total peak area of all volatile organic compounds in a particular treatment. Several minor air-

peaks were not included. RT, retention time. The values after  $\pm$  indicate the standard deviations of three replicates.
