# Supplementary material for: Unraveling Microbial Volatile Elicitors Using a Transparent Methodology for Induction of Systemic Resistance and Regulation of Antioxidant Genes at Expression Levels in Chili against Bacterial Wilt Disease
Source: MDPI journal article supplement (doi:10.3390/antiox11020404), 2022-02-16
Supplement: s1 [file s1]

**Table 4.2.14. Supplementary Table S6** Effect of volatile compound produced by biocontrol agents on induction of Superoxide dismutase activities in chilli Roots against *R. solanacearum* in glasshouse condition

| Treatments                        | Superoxide dismutase activity ( $\Delta OD/min/mg$ protein) |                          |                         |                          |                         |            |
|-----------------------------------|-------------------------------------------------------------|--------------------------|-------------------------|--------------------------|-------------------------|------------|
|                                   | 0 hapi                                                      | 24hapi                   | 48hapi                  | 72hapi                   | 96hapi                  | Mean value |
| T1 (Control)                      | 0.0027 $\pm$ 0.02<br>b                                      | 0.0028 $\pm$ 0.024e      | 0.0035 $\pm$ 0.030<br>e | 0.0031 $\pm$ 0.027d      | 0.0027 $\pm$ 0.026<br>d | 0.0029     |
| T2 ( <i>B. subtilis</i> KA9)      | 0.0028 $\pm$ 0.03<br>b                                      | 0.00534 $\pm$ 0.029<br>d | 0.0071 $\pm$ 0.027c     | 0.0064 $\pm$ 0.033a<br>b | 0.0043 $\pm$ 0.034c     | 0.0051     |
| T3 ( <i>P. fluorescens</i> PDS1)  | 0.0027 $\pm$ 0.03<br>b                                      | 0.0055 $\pm$ 0.035d      | 0.0063 $\pm$ 0.028<br>d | 0.0061 $\pm$ 0.031a<br>b | 0.0045 $\pm$ 0.036<br>b | 0.0050     |
| T4 ( <i>B. subtilis</i> KA9 + RS) | 0.0033 $\pm$ 0.03<br>a                                      | 0.0066 $\pm$ 0.030c      | 0.0083 $\pm$ 0.023<br>b | 0.0068 $\pm$ 0.030a      | 0.0052 $\pm$ 0.040<br>a | 0.0060     |
| T5 ( <i>P. fluorescens</i> +RS)   | 0.0028 $\pm$ 0.03<br>b                                      | 0.0075 $\pm$ 0.029a      | 0.0085 $\pm$ 0.025<br>b | 0.0055 $\pm$ 0.034c      | 0.0045 $\pm$ 0.033<br>b | 0.0057     |
| T6(RS+KA9+ PDS1)                  | 0.0033 $\pm$ 0.03<br>a                                      | 0.0072 $\pm$ 0.031b      | 0.0091 $\pm$ 0.026<br>a | 0.0063 $\pm$ 0.041a<br>b | 0.0047 $\pm$ 0.031<br>b | 0.0061     |
| T7 (RS)                           | 0.0029 $\pm$ 0.03<br>b                                      | 0.0056 $\pm$ 0.032d      | 0.0065 $\pm$ 0.026c     | 0.0056 $\pm$ 0.031c      | 0.0046 $\pm$ 0.029<br>b | 0.0050     |
| Mean value                        | 0.0029                                                      | 0.0057                   | 0.0070                  | 0.0056                   | 0.0043                  | -          |
