# Supplementary material for: Unraveling Microbial Volatile Elicitors Using a Transparent Methodology for Induction of Systemic Resistance and Regulation of Antioxidant Genes at Expression Levels in Chili against Bacterial Wilt Disease
Source: MDPI journal article supplement (doi:10.3390/antiox11020404), 2022-02-16
Supplement: s1 [file s1]

**Table 4.2.11. Supplementary Table S3** Effect of volatile compound produce by biocontrol agents on induction of Polyphenyloxidase activities in chilli leaves against *R. solanacearum* in glasshouse condition

| Treatment<br>s                       | Polyphenol oxidase activity ( $\Delta$ OD/min/mg protein) |                                |                                |                                             |                                             |                   |
|--------------------------------------|-----------------------------------------------------------|--------------------------------|--------------------------------|---------------------------------------------|---------------------------------------------|-------------------|
|                                      | 0hapi                                                     | 24hapi                         | 48hapi                         | 72hapi                                      | 96hapi                                      | Mea<br>n<br>value |
| T1<br>(Control)                      | 0.012 $\pm$ 0.001 <sub>b</sub>                            | 0.016 $\pm$ 0.001 <sup>f</sup> | 0.022 $\pm$ 0.002 <sup>f</sup> | 0.019 $\pm$ 0.001 <sup>d</sup>              | 0.018 $\pm$ 0.002 <sup>d</sup>              | 0.017             |
| T2 ( <i>B. subtilis</i><br>KA9)      | 0.012 $\pm$ 0.001 <sub>b</sub>                            | 0.026 $\pm$ 0.001 <sub>e</sub> | 0.043 $\pm$ 0.001 <sub>e</sub> | 0.051 $\pm$ 0.004 <sup>b</sup> <sub>c</sub> | 0.032 $\pm$ 0.001 <sup>c</sup>              | 0.032             |
| T3 ( <i>P. fluorescens</i><br>PDS1)  | 0.015 $\pm$ 0.001 <sub>a</sub>                            | 0.032 $\pm$ 0.001 <sub>d</sub> | 0.060 $\pm$ 0.001 <sub>d</sub> | 0.051 $\pm$ 0.001 <sup>b</sup> <sub>c</sub> | 0.037 $\pm$ 0.003 <sup>b</sup> <sub>c</sub> | 0.039             |
| T4 ( <i>B. subtilis</i> KA9<br>+ RS) | 0.012 $\pm$ 0.001 <sub>b</sub>                            | 0.043 $\pm$ 0.001 <sub>c</sub> | 0.064 $\pm$ 0.001 <sub>c</sub> | 0.060 $\pm$ 0.003 <sup>a</sup> <sub>b</sub> | 0.041 $\pm$ 0.003 <sup>a</sup> <sub>b</sub> | 0.044             |
| T5 ( <i>P. fluorescens</i><br>+ RS)  | 0.012 $\pm$ 0.001 <sub>b</sub>                            | 0.047 $\pm$ 0.001 <sub>b</sub> | 0.074 $\pm$ 0.001 <sub>b</sub> | 0.054 $\pm$ 0.004 <sup>b</sup> <sub>c</sub> | 0.041 $\pm$ 0.003 <sup>a</sup> <sub>b</sub> | 0.045             |
| T6(RS+<br>KA9+<br>PDS1)              | 0.013 $\pm$ 0.001 <sub>b</sub>                            | 0.055 $\pm$ 0.001 <sub>a</sub> | 0.082 $\pm$ 0.001 <sub>a</sub> | 0.064 $\pm$ 0.003 <sup>a</sup>              | 0.048 $\pm$ 0.003 <sup>a</sup>              | 0.052             |
| T7 (RS)                              | 0.012 $\pm$ 0.001 <sub>b</sub>                            | 0.027 $\pm$ 0.001 <sub>e</sub> | 0.045 $\pm$ 0.003 <sub>e</sub> | 0.049 $\pm$ 0.002 <sup>c</sup>              | 0.044 $\pm$ 0.002 <sup>a</sup> <sub>b</sub> | 0.035             |
| Mean<br>value                        | 0.012                                                     | 0.035                          | 0.055                          | 0.049                                       | 0.037                                       | -                 |
| C.D.                                 | 0.002                                                     | 0.002                          | 0.004                          | 0.008                                       | 0.008                                       | -                 |
| SE(m)                                | 0.001                                                     | 0.001                          | 0.001                          | 0.003                                       | 0.003                                       | -                 |
| SE(d)                                | 0.001                                                     | 0.001                          | 0.002                          | 0.004                                       | 0.004                                       | -                 |
| C.V.                                 | 9.712                                                     | 4.407                          | 5.664                          | 12.544                                      | 15.400                                      | -                 |
