# Supplementary material for: Unraveling Microbial Volatile Elicitors Using a Transparent Methodology for Induction of Systemic Resistance and Regulation of Antioxidant Genes at Expression Levels in Chili against Bacterial Wilt Disease
Source: MDPI journal article supplement (doi:10.3390/antiox11020404), 2022-02-16
Supplement: s1 [file s1]

Table.4.2.13. **Supplementary Table S5** Effect of volatile compound produce by biocontrol agents s on induction of Superoxide dismutase activities in chilli leaves against *R. solanacearum* in glasshouse conditions.

| Treatment<br>s                                  | Superoxide dismutase activity ( $\Delta$ OD/min/mg protein) |                                     |                                     |                                |                                     |                   |
|-------------------------------------------------|-------------------------------------------------------------|-------------------------------------|-------------------------------------|--------------------------------|-------------------------------------|-------------------|
|                                                 | 0hapi                                                       | 24hapi                              | 48hapi                              | 72hapi                         | 96hapi                              | Mea<br>n<br>value |
| <b>T1<br/>(Control)</b>                         | 0.022 $\pm$ 0.001 <sup>a</sup><br>b                         | 0.027 $\pm$ 0.003 <sup>d</sup>      | 0.030 $\pm$ 0.003 <sup>d</sup>      | 0.027 $\pm$ 0.003 <sup>c</sup> | 0.021 $\pm$ 0.002 <sup>c</sup>      | 0.025             |
| <b>T2 (<i>B. subtilis</i><br/>KA9)</b>          | 0.021 $\pm$ 0.001 <sup>b</sup>                              | 0.046 $\pm$ 0.003 <sup>c</sup><br>d | 0.063 $\pm$ 0.003 <sup>a</sup><br>b | 0.058 $\pm$ 0.003 <sup>a</sup> | 0.043 $\pm$ 0.003 <sup>a</sup><br>b | 0.046             |
| <b>T3 (<i>P. fluorescen</i><br/>s PDS1)</b>     | 0.021 $\pm$ 0.001 <sup>b</sup>                              | 0.043 $\pm$ 0.003 <sup>c</sup>      | 0.061 $\pm$ 0.004 <sup>c</sup>      | 0.062 $\pm$ 0.003 <sup>a</sup> | 0.044 $\pm$ 0.002 <sup>a</sup><br>b | 0.046             |
| <b>T4<br/>(<i>B. subtilis</i><br/>KA9 + RS)</b> | 0.022 $\pm$ 0.001 <sup>a</sup><br>b                         | 0.055 $\pm$ 0.002 <sup>b</sup><br>c | 0.072 $\pm$ 0.002 <sup>b</sup>      | 0.057 $\pm$ 0.003 <sup>a</sup> | 0.039 $\pm$ 0.002 <sup>b</sup>      | 0.049             |
| <b>T5 (<i>P. fluorescen</i><br/>s + RS)</b>     | 0.023 $\pm$ 0.001 <sup>a</sup><br>b                         | 0.062 $\pm$ 0.003 <sup>b</sup>      | 0.082 $\pm$ 0.004 <sup>a</sup>      | 0.044 $\pm$ 0.003 <sup>b</sup> | 0.049 $\pm$ 0.002 <sup>a</sup><br>b | 0.052             |
| <b>T6(RS+<br/>KA9+<br/>PDS1)</b>                | 0.024 $\pm$ 0.001 <sup>a</sup><br>b                         | 0.081 $\pm$ 0.002 <sup>a</sup>      | 0.063 $\pm$ 0.003 <sup>a</sup><br>b | 0.063 $\pm$ 0.003 <sup>a</sup> | 0.046 $\pm$ 0.002 <sup>a</sup><br>b | 0.048             |
| <b>T7 (RS)</b>                                  | 0.022 $\pm$ 0.001 <sup>a</sup><br>b                         | 0.051 $\pm$ 0.002 <sup>c</sup><br>d | 0.063 $\pm$ 0.003 <sup>a</sup><br>b | 0.056 $\pm$ 0.004 <sup>a</sup> | 0.044 $\pm$ 0.002 <sup>a</sup><br>b | 0.047             |
| <b>Mean<br/>value</b>                           | 0.022                                                       | 0.052                               | 0.062                               | 0.052                          | 0.040                               | -                 |
| <b>C.D.</b>                                     | 0.002                                                       | 0.008                               | 0.009                               | 0.009                          | 0.006                               | -                 |
| <b>SE(m)</b>                                    | 0.001                                                       | 0.003                               | 0.003                               | 0.003                          | 0.002                               | -                 |
| <b>SE(d)</b>                                    | 0.001                                                       | 0.004                               | 0.004                               | 0.004                          | 0.003                               | -                 |
| <b>C.V.</b>                                     | 5.662                                                       | 11.862                              | 11.422                              | 13.178                         | 11.601                              | -                 |
