# Supplementary material for: Unraveling Microbial Volatile Elicitors Using a Transparent Methodology for Induction of Systemic Resistance and Regulation of Antioxidant Genes at Expression Levels in Chili against Bacterial Wilt Disease
Source: MDPI journal article supplement (doi:10.3390/antiox11020404), 2022-02-16
Supplement: s1 [file s1]

**Table S10 4.3.3.** Relative expression levels (log fold change) of defense-related genes by strain PDS1 and KA9 different treatments in chilli leaf tissue following rhizobacteria inoculation and pathogen challenge after 48 hours.

| Defense-related genes | Relative expression levels (log fold change) Minus ddCT |                    |                   |                    |                   |                    |
|-----------------------|---------------------------------------------------------|--------------------|-------------------|--------------------|-------------------|--------------------|
|                       | Mock                                                    | RS                 | KA-9+ RS          | PDS-1 + RS         | KA-9+PDS-1 + RS   | CC                 |
| PAL                   | 0.5 <sup>b</sup>                                        | 2.04 <sup>a</sup>  | 2.75 <sup>a</sup> | 2.59 <sup>a</sup>  | 3.25 <sup>a</sup> | 4.28 <sup>a</sup>  |
| POD                   | 0.3 <sup>d</sup>                                        | 1.96 <sup>c</sup>  | 1.99 <sup>b</sup> | 2.1 <sup>b</sup>   | 2.39 <sup>c</sup> | 3.15 <sup>c</sup>  |
| SOD                   | 1 <sup>a</sup>                                          | 2.03 <sup>a</sup>  | 1 <sup>h</sup>    | 1.62 <sup>d</sup>  | 2.7 <sup>b</sup>  | 3.6 <sup>b</sup>   |
| WRKYa                 | 0.2 <sup>e</sup>                                        | 0.32 <sup>h</sup>  | 0.8 <sup>k</sup>  | 0.82 <sup>i</sup>  | 1.2 <sup>g</sup>  | 1.9 <sup>h</sup>   |
| PAL1                  | -0.5 <sup>g</sup>                                       | 0.86 <sup>f</sup>  | 1.5 <sup>d</sup>  | 1.9 <sup>c</sup>   | 1.57 <sup>h</sup> | 2 <sup>g</sup>     |
| DEF1                  | -1.5 <sup>h</sup>                                       | 1.2 <sup>d</sup>   | 1.7 <sup>c</sup>  | 0.9 <sup>h</sup>   | 1.61 <sup>g</sup> | 3 <sup>d</sup>     |
| CAT2                  | -0.9 <sup>i</sup>                                       | 0.6 <sup>g</sup>   | 1.2 <sup>f</sup>  | 1.34 <sup>e</sup>  | 1.91 <sup>d</sup> | 2.7 <sup>e</sup>   |
| WRKY40                | 0.4 <sup>c</sup>                                        | -0.65 <sup>i</sup> | 1.3 <sup>e</sup>  | 1.4 <sup>f</sup>   | 0.9 <sup>i</sup>  | 1.5 <sup>i</sup>   |
| HSFC1                 | 0.2 <sup>f</sup>                                        | 0.9 <sup>e</sup>   | 0.9 <sup>i</sup>  | 0.8 <sup>j</sup>   | 1.5 <sup>f</sup>  | 0.87 <sup>j</sup>  |
| LOX2                  | 1 <sup>a</sup>                                          | 1.98 <sup>b</sup>  | 1.07 <sup>g</sup> | 1.04 <sup>g</sup>  | 1.84 <sup>e</sup> | -0.66 <sup>k</sup> |
| NPR1                  | 0.2 <sup>f</sup>                                        | -0.93 <sup>k</sup> | 0.67 <sup>j</sup> | -0.22 <sup>k</sup> | 0.74 <sup>j</sup> | 2.15 <sup>f</sup>  |
