# Supplementary material for: Unraveling Microbial Volatile Elicitors Using a Transparent Methodology for Induction of Systemic Resistance and Regulation of Antioxidant Genes at Expression Levels in Chili against Bacterial Wilt Disease
Source: MDPI journal article supplement (doi:10.3390/antiox11020404), 2022-02-16
Supplement: s1 [file s1]

**Table S9 4.3.2.** Relative expression levels (log fold change) of defense-related genes by strains PDS1 and KA9 different treatments in chilli root tissue following rhizobacteria inoculation and pathogen challenge after 48 hours.

| Defense-related genes | Relative expression levels (log fold change) Minus ddCT |                    |                    |                    |                   |                    |
|-----------------------|---------------------------------------------------------|--------------------|--------------------|--------------------|-------------------|--------------------|
|                       | Mock                                                    | RS                 | KA9+ RS            | PDS1 + RS          | KA9+PDS1 + RS     | CC                 |
| PAL                   | 0                                                       | 2.54 <sup>a</sup>  | 3.25 <sup>a</sup>  | 3.09 <sup>a</sup>  | 3.75 <sup>a</sup> | 4.78 <sup>b</sup>  |
| POD                   | 0                                                       | 2.26 <sup>b</sup>  | 2.29 <sup>d</sup>  | 2.6 <sup>b</sup>   | 3.22 <sup>c</sup> | 3.5 <sup>f</sup>   |
| SOD                   | 0                                                       | 1.03 <sup>e</sup>  | 2.46 <sup>c</sup>  | 2.12 <sup>c</sup>  | 3.57 <sup>b</sup> | 3.68 <sup>e</sup>  |
| WRKYa                 | 0                                                       | 0.64 <sup>h</sup>  | 1.36 <sup>g</sup>  | 0.82 <sup>f</sup>  | 1.43 <sup>f</sup> | 2.66 <sup>i</sup>  |
| PAL1                  | 0                                                       | 1.51 <sup>d</sup>  | 0.99 <sup>h</sup>  | 1.58 <sup>d</sup>  | 1.17 <sup>g</sup> | 5.04 <sup>a</sup>  |
| DEF1                  | 0                                                       | 1.62 <sup>c</sup>  | 1.11 <sup>f</sup>  | 0.48 <sup>g</sup>  | 2.11 <sup>e</sup> | 4.03 <sup>c</sup>  |
| CAT2                  | 0                                                       | -0.34 <sup>j</sup> | 2.6 <sup>b</sup>   | -0.34 <sup>k</sup> | 0.91 <sup>h</sup> | 3.75 <sup>d</sup>  |
| WRKY40                | 0                                                       | -0.05 <sup>i</sup> | -0.23 <sup>j</sup> | 0.24 <sup>h</sup>  | 0.91 <sup>h</sup> | 1.01 <sup>i</sup>  |
| HSFC1                 | 0                                                       | 1.08 <sup>f</sup>  | 0.24 <sup>i</sup>  | -0.25 <sup>j</sup> | 0.9 <sup>h</sup>  | 0.87 <sup>j</sup>  |
| LOX2                  | 0                                                       | -0.98 <sup>k</sup> | -0.93 <sup>k</sup> | 0.04 <sup>i</sup>  | 0.84 <sup>i</sup> | -0.63 <sup>k</sup> |
| NPR1                  | 0                                                       | 0.93 <sup>g</sup>  | 1.63 <sup>e</sup>  | 1.22 <sup>e</sup>  | 2.84 <sup>d</sup> | 3.13 <sup>g</sup>  |
