# Supplementary material for: Unraveling Microbial Volatile Elicitors Using a Transparent Methodology for Induction of Systemic Resistance and Regulation of Antioxidant Genes at Expression Levels in Chili against Bacterial Wilt Disease
Source: MDPI journal article supplement (doi:10.3390/antiox11020404), 2022-02-16
Supplement: s1 [file s1]

**Table 4.2.15. Supplementary Table S7** Effect of volatile compound produce by biocontrol agents on induction of phenyl ammonium lyase (PAL) activities in chilli leaves against *R. solanacearum* under glasshouse condition.

| Treatment                         | PAL activity (μmole/ml) |                |                |                |                 |            |
|-----------------------------------|-------------------------|----------------|----------------|----------------|-----------------|------------|
|                                   | 0 hapi                  | 24hapi         | 48hapi         | 72hapi         | 96hapi          | Mean value |
| T1 (Control)                      | 37.666 ±1.24c           | 42.333 ±3.24c  | 49.333 ±2.56f  | 48.6667 ±2.11c | 45.333 ±3.23d   | 44.52      |
| T2 ( <i>B. subtilis</i> KA9)      | 47.666±2.04b            | 65.000 ±3.20b  | 192.333 ±2.23e | 136.333 ±2.34b | 90.000 ±2.84c   | 106        |
| T3 ( <i>P. fluorescens</i> PDS1)  | 49.333±3.26b            | 66.333 ±2.22b  | 219.333 ±2.67d | 145.333 ±2.28b | 95.66667 ±2.18c | 114.8      |
| T4 ( <i>B. subtilis</i> KA9 + RS) | 52.0000 ±3.29b          | 77.333 ±2.23ab | 245 .000±2.19c | 191.933 ±2.34a | 113.666 ±2.24b  | 135.6      |
| T5 ( <i>P. fluorescens</i> + RS)  | 62.000 ±2.24a           | 84.333 ±1.27a  | 265.000 ±1.64b | 192.000 ±1.24a | 123.333 ±2.84b  | 145.60     |
| T6(RS+ KA9+ PDS1)                 | 65.000 ±2.28a           | 88.333 ±3.24a  | 312.667 ±2.64a | 207.000 ±3.12a | 137 .000±2.37a  | 145.80     |
| T7 (RS)                           | 48.333 ±2.90b           | 63.666 ±2.25b  | 188.667 ±3.24e | 134.333 ±2.21b | 98.000 ±2.28c   | 106.8      |
| Mean value                        | 51.42                   | 69.28          | 210.00         | 150.42         | 100.14          | -          |
