# Supplementary material for: Unraveling Microbial Volatile Elicitors Using a Transparent Methodology for Induction of Systemic Resistance and Regulation of Antioxidant Genes at Expression Levels in Chili against Bacterial Wilt Disease
Source: MDPI journal article supplement (doi:10.3390/antiox11020404), 2022-02-16
Supplement: s1 [file s1]

**Table 4.2.16. Supplementary Table S8** Effect of volatile compound produce by biocontrol agents on induction of phenyl ammonium lyase activities in chilli roots against *R. solanacearum* in glasshouse condition.

| Treatment<br>s                              | PAL activity (μmole/ml) |                  |                  |                   |                   |               |
|---------------------------------------------|-------------------------|------------------|------------------|-------------------|-------------------|---------------|
|                                             | 0 hapi                  | 24hapi           | 48hapi           | 72hapi            | 96hapi            | Mean<br>value |
| T1<br>(Control)                             | 33.33±2.24a             | 35.00±1.89e      | 41.00±2.35e      | 38.00±2.00d       | 37.00±2.36f       | 36.80         |
| T2 ( <i>B. subtilis</i><br>KA9)             | 32.00±2.36a             | 61.00±2.56d      | 187.00±2.36<br>d | 133.00±3.08b<br>c | 83.00±2.36de      | 99.20         |
| T3 ( <i>P. fluorescen</i><br><i>s</i> PDS1) | 32.67±2.55a             | 65.00±2.81c<br>d | 213.00±4.41<br>c | 141.67±2.73b      | 90.33±2.93cd      | 108.3<br>2    |
| T4<br>( <i>B. subtilis</i><br>KA9 + RS)     | 34.67±1.874<br>a        | 73.00±2.14b<br>c | 240.33±3.89<br>b | 185.33±2.84a      | 104.67±2.65b<br>c | 127.2<br>0    |
| T5 ( <i>P. fluorescen</i><br><i>s</i> + RS) | 38.33±1.87a             | 80.33±2.17a<br>b | 254.67±3.16<br>b | 187.00±2.24a      | 115.67±3.85b      | 134.8<br>0    |
| T6(RS+<br>KA9+<br>PDS1)                     | 31.00±1.89a             | 88.00±2.00a      | 299.67±3.40<br>a | 199.33±3.42a      | 132.00±3.18a      | 149.8<br>0    |
| T7 (RS)                                     | 36.00±1.89a             | 58.00±2.86d      | 184.67±2.65<br>d | 124.33±2.92c      | 72.33±2.35e       | 94.80         |
| Mean<br>value                               | 33.71                   | 65.71            | 202.57           | 143.85            | 90.42             | -             |
