# Supplementary material for: Unraveling Microbial Volatile Elicitors Using a Transparent Methodology for Induction of Systemic Resistance and Regulation of Antioxidant Genes at Expression Levels in Chili against Bacterial Wilt Disease
Source: MDPI journal article supplement (doi:10.3390/antiox11020404), 2022-02-16
Supplement: s1 [file s1]

**Table 4.2.12. Supplementary Table S4** Effect of volatile compound produce by biocontrol agents on induction of Polyphenyloxidase activities in chilli roots against *R. solanacearum* in glasshouse conditions.

| Treatments                        | Polyphenol oxidase activity ( $\Delta OD/\text{min}/\text{mg protein}$ ) |                                 |                                 |                                 |                                 |            |
|-----------------------------------|--------------------------------------------------------------------------|---------------------------------|---------------------------------|---------------------------------|---------------------------------|------------|
|                                   | 0 hapi                                                                   | 24 hapi                         | 48hapi                          | 72hapi                          | 96hapi                          | Mean value |
| T1 (Control)                      | 0.0019 $\pm$ 0.017 <sup>b</sup>                                          | 0.0020 $\pm$ 0.025 <sup>e</sup> | 0.0019 $\pm$ 0.017 <sup>d</sup> | 0.0023 $\pm$ 0.021 <sup>e</sup> | 0.0025 $\pm$ 0.026 <sup>e</sup> | 0.0021     |
| T2 ( <i>B. subtilis</i> KA9)      | 0.0021 $\pm$ 0.024 <sup>a</sup>                                          | 0.0033 $\pm$ 0.022 <sup>d</sup> | 0.0027 $\pm$ 0.031 <sup>c</sup> | 0.0052 $\pm$ 0.032 <sup>c</sup> | 0.0042 $\pm$ 0.028 <sup>c</sup> | 0.0035     |
| T3 ( <i>P. fluorescens</i> PDS1)  | 0.0023 $\pm$ 0.025 <sup>a</sup>                                          | 0.0042 $\pm$ 0.025 <sup>c</sup> | 0.0032 $\pm$ 0.026 <sup>c</sup> | 0.0064 $\pm$ 0.033 <sup>b</sup> | 0.0044 $\pm$ 0.029 <sup>b</sup> | 0.0041     |
| T4 ( <i>B. subtilis</i> KA9 + RS) | 0.0022 $\pm$ 0.026 <sup>a</sup>                                          | 0.0054 $\pm$ 0.028 <sup>b</sup> | 0.0038 $\pm$ 0.027 <sup>b</sup> | 0.0058 $\pm$ 0.033 <sup>b</sup> | 0.0046 $\pm$ 0.028 <sup>a</sup> | 0.0043     |
| T5 ( <i>P. fluorescens</i> + RS)  | 0.0019 $\pm$ 0.029 <sup>b</sup>                                          | 0.0058 $\pm$ 0.032 <sup>b</sup> | 0.0038 $\pm$ 0.031 <sup>b</sup> | 0.0063 $\pm$ 0.034 <sup>b</sup> | 0.0046 $\pm$ 0.026 <sup>a</sup> | 0.0044     |
| T6(RS+ KA9+ PDS1)                 | 0.0020 $\pm$ 0.025 <sup>b</sup>                                          | 0.0067 $\pm$ 0.030 <sup>a</sup> | 0.0043 $\pm$ 0.028 <sup>a</sup> | 0.0075 $\pm$ 0.034 <sup>a</sup> | 0.0048 $\pm$ 0.031 <sup>a</sup> | 0.0050     |
| T7 (RS)                           | 0.0023 $\pm$ 0.025 <sup>a</sup>                                          | 0.0035 $\pm$ 0.026 <sup>d</sup> | 0.0029 $\pm$ 0.026 <sup>c</sup> | 0.0042 $\pm$ 0.020 <sup>d</sup> | 0.0033 $\pm$ 0.022 <sup>d</sup> | 0.0032     |
| Mean value                        | 0.0021                                                                   | 0.0044                          | 0.0032                          | 0.0053                          | 0.0040                          | -          |
