# Supplementary material for: Unraveling Microbial Volatile Elicitors Using a Transparent Methodology for Induction of Systemic Resistance and Regulation of Antioxidant Genes at Expression Levels in Chili against Bacterial Wilt Disease
Source: Antioxidants (Basel). 2022 Feb 16;11(2):404. doi: 10.3390/antiox11020404 (PMC8869530; doi:10.3390/antiox11020404)
Supplement: Supplementary file 1 [file antioxidants-11-00404-s001.zip]

Archive with 16 entries (16 files):
- suplementary Figure S1.pdf
- suplementary Figure S2.pdf
- suplementary M and M.pdf
- suplementary Table S1.pdf
- suplementry Table S3.pdf
- supplemantry Table S2.pdf
- supplementary Figure S3.pdf
- supplementary Table S10.pdf
- supplementary Table S11.pdf
- Supplementary Table S12.pdf
- supplementary Table S4.pdf
- supplementary Table S5.pdf
- supplementary Table S6.pdf
- supplementary Table S7.pdf
- supplementary Table S8.pdf
- supplementary Table S9.pdf
